# Supplementary material
Source: PubMed Central journal article supplement (PMC3804308)
Supplement: NIHMS400966-supplement-3.pdf [file NIHMS400966-supplement-3.pdf]

**Supplementary Table 1. Association of Best SNPs in African Americans with Fasting Glucose and Fasting Insulin in European Ancestry Populations**

| Nearest gene(s)                        | Chr | Position  | Best SNP <sup>a</sup> | Allele <sup>b</sup> | EAFC <sup>c</sup> | Effect <sup>d</sup> | 95% C.I.      | P-value                      |
|----------------------------------------|-----|-----------|-----------------------|---------------------|-------------------|---------------------|---------------|------------------------------|
| <b>Fasting Glucose associated loci</b> |     |           |                       |                     |                   |                     |               |                              |
| <i>PROX1</i>                           | 1   | 212261507 | rs7519597             | N/A                 | N/A               | N/A                 | N/A           | N/A                          |
| <i>G6PC2</i>                           | 2   | 169509734 | rs853789              | A/G                 | 0.375             | -0.068              | -0.076--0.060 | <b>1.91x10<sup>-67</sup></b> |
| <i>GCKR</i>                            | 2   | 27438170  | rs7586601             | A/G                 | 0.553             | -0.019              | -0.026--0.011 | <b>4.28x10<sup>-7</sup></b>  |
| <i>ADCY5</i>                           | 3   | 124552510 | rs10934645            | A/G                 | 0.170             | 0.007               | -0.011-0.024  | 4.54x10 <sup>-1</sup>        |
| <i>SLC2A2</i>                          | 3   | 172296993 | rs9827202             | T/C                 | 0.090             | 0.006               | -0.007-0.020  | 3.50x10 <sup>-1</sup>        |
| <i>GCK</i>                             | 7   | 44195593  | rs1799884             | T/C                 | 0.169             | 0.062               | 0.053-0.072   | <b>6.36x10<sup>-37</sup></b> |
| <i>DGKB-TMEM195</i>                    | 7   | 15111235  | rs17327498            | A/G                 | 0.942             | 0.002               | -0.015-0.019  | 8.23x10 <sup>-1</sup>        |
| <i>SLC30A8</i>                         | 8   | 118304453 | rs2649098             | T/C                 | 0.168             | -0.003              | -0.015-0.009  | 6.56x10 <sup>-1</sup>        |
| <i>GLIS3</i>                           | 9   | 4319209   | rs3895473             | A/G                 | 0.780             | 0.007               | -0.003-0.017  | 2.03x10 <sup>-1</sup>        |
| <i>ADRA2A</i>                          | 10  | 112913361 | rs7908674             | A/G                 | 0.465             | 0.001               | -0.006-0.009  | 7.58x10 <sup>-1</sup>        |
| <i>TCF7L2</i>                          | 10  | 114852926 | rs7909517             | N/A                 | N/A               | N/A                 | N/A           | N/A                          |
| <i>MTNR1B</i>                          | 11  | 92348358  | rs10830963            | C/G                 | 0.708             | -0.079              | -0.087--0.070 | <b>1.26x10<sup>-68</sup></b> |
| <i>MADD</i>                            | 11  | 47200241  | rs1685404             | C/G                 | 0.355             | 0.000               | -0.008-0.008  | 9.53x10 <sup>-1</sup>        |
| <i>FADS1</i>                           | 11  | 61525549  | rs7937198             | A/G                 | 0.635             | 0.003               | -0.005-0.010  | 4.62x10 <sup>-1</sup>        |
| <i>CRY2</i>                            | 11  | 45829667  | rs11605924            | A/C                 | 0.492             | 0.022               | 0.015-0.029   | 1.52x10 <sup>-9</sup>        |
| <i>C2CD4B</i>                          | 15  | 60165933  | rs893157              | T/C                 | 0.516             | -0.007              | -0.014-0.001  | 6.92x10 <sup>-2</sup>        |
| <b>Fasting Insulin associated loci</b> |     |           |                       |                     |                   |                     |               |                              |
| <i>GCKR</i>                            | 2   | 27438170  | rs7586601             | A/G                 | 0.553             | -0.009              | -0.017--0.002 | 1.70x10 <sup>-2</sup>        |
| <i>IGF1</i>                            | 12  | 101508605 | rs7970320             | T/C                 | 0.598             | 0.000               | -0.008-0.007  | 9.18x10 <sup>-1</sup>        |
| <b>T2D associated loci</b>             |     |           |                       |                     |                   |                     |               |                              |
| <i>THADA</i>                           | 2   | 43529402  | rs6724325             | N/A                 | N/A               | N/A                 | N/A           | N/A                          |
| <i>ADAMTS9</i>                         | 3   | 64659981  | rs4688504             | T/C                 | 0.468             | -0.003              | -0.010-0.005  | 4.89x10 <sup>-1</sup>        |
| <i>IGF2BP2</i>                         | 3   | 186919528 | rs7627308             | N/A                 | N/A               | N/A                 | N/A           | N/A                          |
| <i>ZBED3</i>                           | 5   | 76454133  | rs12517269            | A/G                 | 0.856             | 0.016               | 0.006-0.027   | <b>3.00x10<sup>-3</sup></b>  |
| <i>CDKAL1</i>                          | 6   | 21008207  | rs9368255             | T/C                 | 0.847             | -0.013              | -0.031-0.005  | 1.45x10 <sup>-1</sup>        |
| <i>TP53INP1</i>                        | 8   | 96036332  | rs509594              | C/G                 | 0.587             | -0.011              | -0.018--0.003 | <b>4.27x10<sup>-3</sup></b>  |
| <i>SLC30A8</i>                         | 8   | 118304453 | rs2649098             | T/C                 | 0.168             | -0.003              | -0.015-0.009  | 6.56x10 <sup>-1</sup>        |
| <i>CDKN2A/B</i>                        | 9   | 22293465  | rs10965319            | A/T                 | 0.593             | -0.002              | -0.010-0.007  | 7.06x10 <sup>-1</sup>        |
| <i>CDC123/CAMKID</i>                   | 10  | 12446905  | rs7074893             | T/G                 | 0.934             | -0.009              | -0.040-0.022  | 5.81x10 <sup>-1</sup>        |
| <i>HHEX</i>                            | 10  | 94576008  | rs11187186            | T/C                 | 0.593             | -0.003              | -0.010-0.005  | 4.89x10 <sup>-1</sup>        |
| <i>KCNQ1</i>                           | 11  | 2490838   | rs2011766             | T/C                 | 0.183             | -0.013              | -0.023--0.004 | <b>4.93x10<sup>-3</sup></b>  |
| <i>CENTD2</i>                          | 11  | 72067275  | rs6592481             | T/C                 | 0.088             | 0.007               | -0.006-0.021  | 2.77x10 <sup>-1</sup>        |
| <i>MTNR1B</i>                          | 11  | 92348358  | rs10830963            | C/G                 | 0.708             | -0.079              | -0.087--0.070 | <b>1.26x10<sup>-68</sup></b> |
| <i>PRC1</i>                            | 15  | 89195519  | rs10083635            | N/A                 | N/A               | N/A                 | N/A           | N/A                          |

<sup>a</sup>. The best SNP in African American from Table 3 and Table 5

<sup>b</sup>. Effect (trait-raising)/Other allele

<sup>c</sup>. EAF=Effect allele frequency

<sup>d</sup> Unit: (mmol/L) per effect allele
