# Supplementary material
Source: PubMed Central journal article supplement (PMC3804308)
Supplement: NIHMS400966-supplement-4.pdf [file NIHMS400966-supplement-4.pdf]

**Supplementary Table 2 HOMA-IR and HOMA-B Associations in African Americans**

**Fasting Glucose Loci**

| Nearest gene(s)     | Index SNP in EuA <sup>b</sup> | Chr. | Position  | HOMA-B in EuA <sup>a</sup> |                  |        |               | HOMA-B in AfA <sup>a</sup> |        |               | P-value                     |
|---------------------|-------------------------------|------|-----------|----------------------------|------------------|--------|---------------|----------------------------|--------|---------------|-----------------------------|
|                     |                               |      |           | Alleles <sup>c</sup>       | EAF <sup>d</sup> | Effect | 95% C.I.      | EAF <sup>d</sup>           | Effect | 95% C.I.      |                             |
| <i>PROX1</i>        | rs340874                      | 1    | 212225879 | C/T                        | 0.52             | -0.008 | -0.014--0.002 | 0.170                      | -0.036 | -0.065--0.008 | 1.27x10 <sup>-2</sup>       |
| <i>G6PC2</i>        | rs560887                      | 2    | 169471394 | C/T                        | 0.7              | -0.042 | -0.050--0.034 | 0.943                      | -0.068 | -0.114--0.022 | <b>3.88x10<sup>-3</sup></b> |
| <i>GCKR</i>         | rs780094                      | 2    | 27594741  | C/T                        | 0.62             | 0.014  | 0.008-0.020   | 0.817                      | 0.011  | -0.016-0.037  | 4.43x10 <sup>-1</sup>       |
| <i>ADCY5</i>        | rs11708067                    | 3    | 124548468 | A/G                        | 0.78             | -0.023 | -0.031--0.015 | 0.844                      | -0.045 | -0.073--0.016 | 2.25x10 <sup>-3</sup>       |
| <i>SLC2A2</i>       | rs11920090                    | 3    | 172200215 | T/A                        | 0.87             | -0.012 | -0.022--0.002 | 0.646                      | -0.003 | -0.025-0.018  | 7.65x10 <sup>-1</sup>       |
| <i>GCK</i>          | rs4607517                     | 7    | 44202193  | A/G                        | 0.16             | -0.025 | -0.035--0.015 | 0.101                      | -0.087 | -0.126--0.049 | <b>9.55x10<sup>-6</sup></b> |
| <i>DGKB/TMEM195</i> | rs2191349                     | 7    | 15030834  | T/G                        | 0.52             | -0.017 | -0.023--0.011 | 0.593                      | -0.052 | -0.074--0.030 | <b>2.99x10<sup>-6</sup></b> |
| <i>SLC30A8</i>      | rs13266634                    | 8    | 118253964 | C/T                        | 0.68             | -0.016 | -0.024--0.008 | 0.908                      | -0.010 | -0.048-0.028  | 5.92x10 <sup>-1</sup>       |
| <i>GLIS3</i>        | rs7034200                     | 9    | 4279050   | A/C                        | 0.49             | -0.020 | -0.028--0.012 | 0.631                      | -0.011 | -0.033-0.010  | 3.01x10 <sup>-1</sup>       |
| <i>ADRA2A</i>       | rs10885122                    | 10   | 113032083 | G/T                        | 0.87             | -0.010 | -0.020-0.000  | 0.334                      | 0.006  | -0.017-0.029  | 6.04x10 <sup>-1</sup>       |
| <i>TCF7L2</i>       | rs7903146                     | 10   | 114748339 | T/C                        | 0.29             | -0.020 | -0.028--0.012 | 0.283                      | -0.033 | -0.058--0.008 | <b>1.02x10<sup>-2</sup></b> |
| <i>MTNR1B</i>       | rs10830963                    | 11   | 92348358  | G/C                        | 0.3              | -0.034 | -0.042--0.026 | 0.074                      | -0.062 | -0.102--0.022 | <b>2.39x10<sup>-3</sup></b> |
| <i>MADD</i>         | rs7944584                     | 11   | 47292896  | A/T                        | 0.75             | -0.007 | -0.015-0.001  | 0.950                      | -0.001 | -0.048-0.047  | 9.84x10 <sup>-1</sup>       |
| <i>FADS1</i>        | rs174550                      | 11   | 61328054  | T/C                        | 0.64             | -0.020 | -0.026--0.014 | 0.916                      | -0.017 | -0.055-0.021  | 3.74x10 <sup>-1</sup>       |
| <i>CRY2</i>         | rs11605924                    | 11   | 45829667  | A/C                        | 0.49             | -0.005 | -0.011-0.001  | 0.865                      | 0.013  | -0.018-0.044  | 4.07x10 <sup>-1</sup>       |
| <i>C2CD4B</i>       | rs11071657                    | 15   | 60221254  | A/G                        | 0.63             | -0.013 | -0.021--0.005 | 0.868                      | -0.003 | -0.040-0.034  | 8.71x10 <sup>-1</sup>       |

**Fasting Insulin Loci**

| Nearest gene(s) | Index SNP in EuA <sup>b</sup> | Chr. | Position  | HOMA-IR in EuA       |                  |        |             | HOMA-IR in AfA   |        |              | P-value               |
|-----------------|-------------------------------|------|-----------|----------------------|------------------|--------|-------------|------------------|--------|--------------|-----------------------|
|                 |                               |      |           | Alleles <sup>c</sup> | EAF <sup>d</sup> | Effect | 95% C.I.    | EAF <sup>d</sup> | Effect | 95% C.I.     |                       |
| <i>GCKR</i>     | rs780094                      | 2    | 27594741  | C/T                  | 0.62             | 0.035  | 0.027-0.043 | 0.817            | 0.030  | 0.000-0.060  | 5.02x10 <sup>-2</sup> |
| <i>IGF1</i>     | rs35767                       | 12   | 101399699 | G/A                  | 0.85             | 0.013  | 0.001-0.025 | 0.570            | 0.001  | -0.024-0.025 | 9.48x10 <sup>-1</sup> |

<sup>a</sup>. The loci in this table were all obtained from Dupuis et al (2010)

<sup>b</sup>. EuA = European American and AfA = African American

<sup>c</sup>. Effect/Other allele

<sup>d</sup>. EAF=Effect allele frequency
