# Supplementary material
Source: PubMed Central journal article supplement (PMC3804308)
Supplement: NIHMS400966-supplement-5.pdf [file NIHMS400966-supplement-5.pdf]

**Supplementary Table 3 Regional Interrogation of HOMA-IR and HOMA-B Associations in African Americans**

**Fasting Glucose Loci**

**HOMA-B result in AfA<sup>a</sup> for the Best FG SNP in AfA in the Region**

| <b>Best FG SNP<sup>b</sup></b> |           |                                            |                                            |                      |                  |        |               |                             |                     |                             |
|--------------------------------|-----------|--------------------------------------------|--------------------------------------------|----------------------|------------------|--------|---------------|-----------------------------|---------------------|-----------------------------|
| in AfA                         | Position  | LD <sup>c</sup> in YRI r <sup>2</sup> (D') | LD <sup>d</sup> in CEU r <sup>2</sup> (D') | Alleles <sup>e</sup> | EAF <sup>f</sup> | Effect | 95% C.I.      | P-value                     | Eff. N <sup>g</sup> | Adjusted-p-value            |
| rs7519597                      | 212261507 | 0.004 (1.000)                              | N/A                                        | T/C                  | 0.037            | 0.045  | -0.017-0.106  | 1.56x10 <sup>-1</sup>       | 90                  | 1.00x10 <sup>-0</sup>       |
| rs853789                       | 169509734 | N/A                                        | 0.692 (0.916)                              | A/G                  | 0.106            | 0.041  | 0.006-0.075   | <b>2.22x10<sup>-2</sup></b> | 105                 | 1.00x10 <sup>-0</sup>       |
| rs7586601                      | 27438170  | 0.169 (0.491)                              | 0.549 (0.956)                              | A/G                  | 0.238            | -0.024 | -0.049-0.001  | 5.87x10 <sup>-2</sup>       | 22                  | 1.00x10 <sup>-0</sup>       |
| rs10934645                     | 124552510 | 0.009 (1.000)                              | 0.022 (1.000)                              | A/G                  | 0.091            | -0.002 | -0.044-0.039  | 9.09x10 <sup>-1</sup>       | 66                  | 1.00x10 <sup>-0</sup>       |
| rs9827202                      | 172296993 | 0.005 (0.105)                              | 0.000 (0.118)                              | T/C                  | 0.442            | 0.019  | -0.003-0.041  | 8.69x10 <sup>-2</sup>       | 65                  | 1.00x10 <sup>-0</sup>       |
| rs1799884                      | 44195593  | 0.469 (1.000)                              | 0.003 (0.196)                              | T/C                  | 0.177            | -0.065 | -0.092--0.038 | <b>2.15x10<sup>-6</sup></b> | 34                  | <b>7.31x10<sup>-5</sup></b> |
| rs17327498                     | 15111235  | 0.001 (0.184)                              | 0.003 (0.196)                              | A/G                  | 0.972            | 0.028  | -0.048-0.104  | 4.77x10 <sup>-1</sup>       | 90                  | 1.00x10 <sup>-0</sup>       |
| rs2649098                      | 118304453 | 0.008 (1.000)                              | 0.004 (0.088)                              | T/C                  | 0.106            | -0.016 | -0.050-0.018  | 3.54x10 <sup>-1</sup>       | 82                  | 1.00x10 <sup>-0</sup>       |
| rs3895473                      | 4319209   | 0.003 (0.098)                              | 0.006 (0.158)                              | A/G                  | 0.801            | -0.010 | -0.036-0.016  | 4.50x10 <sup>-1</sup>       | 169                 | 1.00x10 <sup>-0</sup>       |
| rs7908674                      | 112913361 | 0.070 (0.426)                              | 0.028 (0.500)                              | A/G                  | 0.160            | -0.017 | -0.048-0.015  | 2.96x10 <sup>-1</sup>       | 83                  | 1.00x10 <sup>-0</sup>       |
| rs7909517                      | 114852926 | 0.006 (0.255)                              | 0.003 (1.000)                              | C/G                  | 0.103            | 0.005  | -0.035-0.045  | 8.08x10 <sup>-1</sup>       | 72                  | 1.00x10 <sup>-0</sup>       |
| rs10830963                     | 92348358  | same snp                                   | same snp                                   | C/G                  | 0.926            | 0.062  | 0.022-0.102   | <b>2.39x10<sup>-3</sup></b> | 86                  | 2.05x10 <sup>-1</sup>       |
| rs1685404                      | 47200241  | N/A                                        | 0.258 (1.000)                              | C/G                  | 0.240            | 0.006  | -0.019-0.030  | 6.52x10 <sup>-1</sup>       | 27                  | 1.00x10 <sup>-0</sup>       |
| rs7937198                      | 61525549  | 0.000 (0.016)                              | 0.003 (0.055)                              | A/G                  | 0.492            | 0.006  | -0.015-0.026  | 5.96x10 <sup>-1</sup>       | 65                  | 1.00x10 <sup>-0</sup>       |
| rs11605924                     | 45829667  | same snp                                   | same snp                                   | A/C                  | 0.865            | 0.013  | -0.018-0.044  | 4.07x10 <sup>-1</sup>       | 58                  | 1.00x10 <sup>-0</sup>       |
| rs893157                       | 60165933  | 0.019 (0.488)                              | 0.174 (0.527)                              | T/C                  | 0.585            | 0.011  | -0.010-0.033  | 3.09x10 <sup>-1</sup>       | 60                  | 1.00x10 <sup>-0</sup>       |

**Fasting Insulin Loci**

**HOMA-IR result in AfA for the Best FI SNP in AfA in the Region**

|           |           |               |               |     |       |        |               |                             |    |                 |
|-----------|-----------|---------------|---------------|-----|-------|--------|---------------|-----------------------------|----|-----------------|
| rs7586601 | 27438170  | 0.169 (0.491) | 0.549 (0.956) | A/G | 0.239 | -0.051 | -0.078--0.023 | <b>3.27x10<sup>-4</sup></b> | 22 | <b>7.20E-03</b> |
| rs7970320 | 101508605 | 0.011 (0.126) | 0.001 (0.067) | T/C | 0.557 | -0.032 | -0.056--0.009 | <b>6.61x10<sup>-3</sup></b> | 59 | 3.90E-01        |

<sup>a</sup>. EuA = European American and AfA = African American

<sup>b</sup>. The loci in this table were all obtained from Table3

<sup>c</sup>. LD in YRI between AfA's best SNP and top SNP in EuA

<sup>d</sup>. LD in CEU between AfA's best SNP and top SNP in EuA

<sup>e</sup>. Effect/Other allele

<sup>f</sup>. EAF=Effect allele frequency

<sup>g</sup>. Number of independent (typed) SNPs interrogated in CARE AA
