# Supplementary material
Source: PubMed Central journal article supplement (PMC3804308)

# Supplementary Figure 1

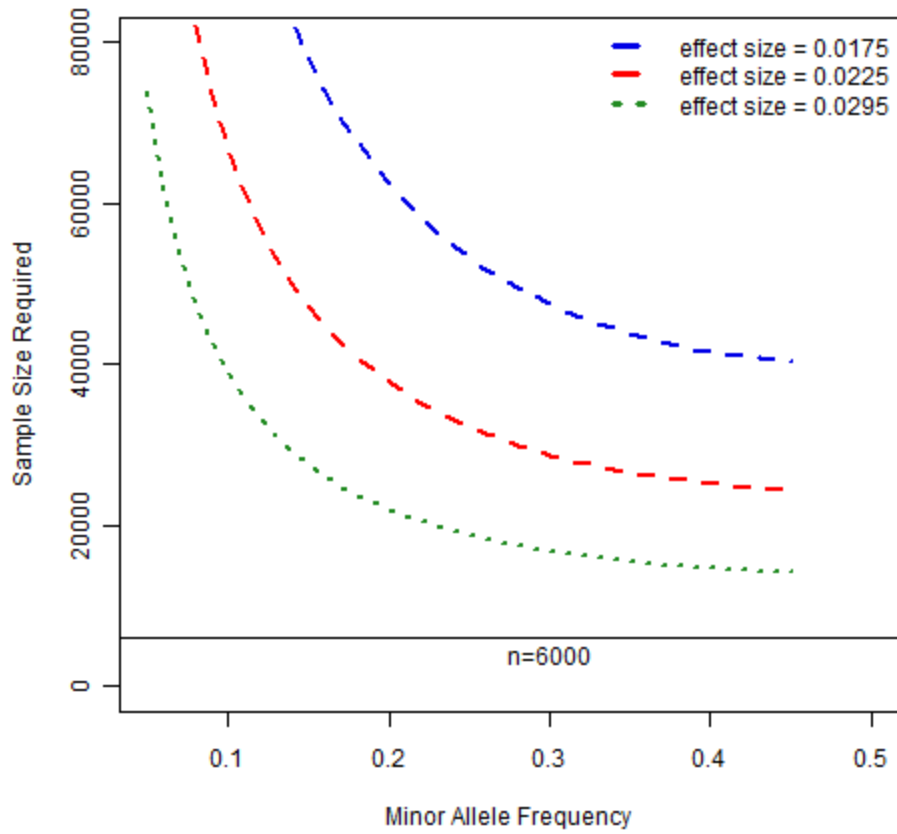

Supplement: NIHMS400966-supplement-1.pdf [file NIHMS400966-supplement-1.pdf]

# Supplementary Figure 2

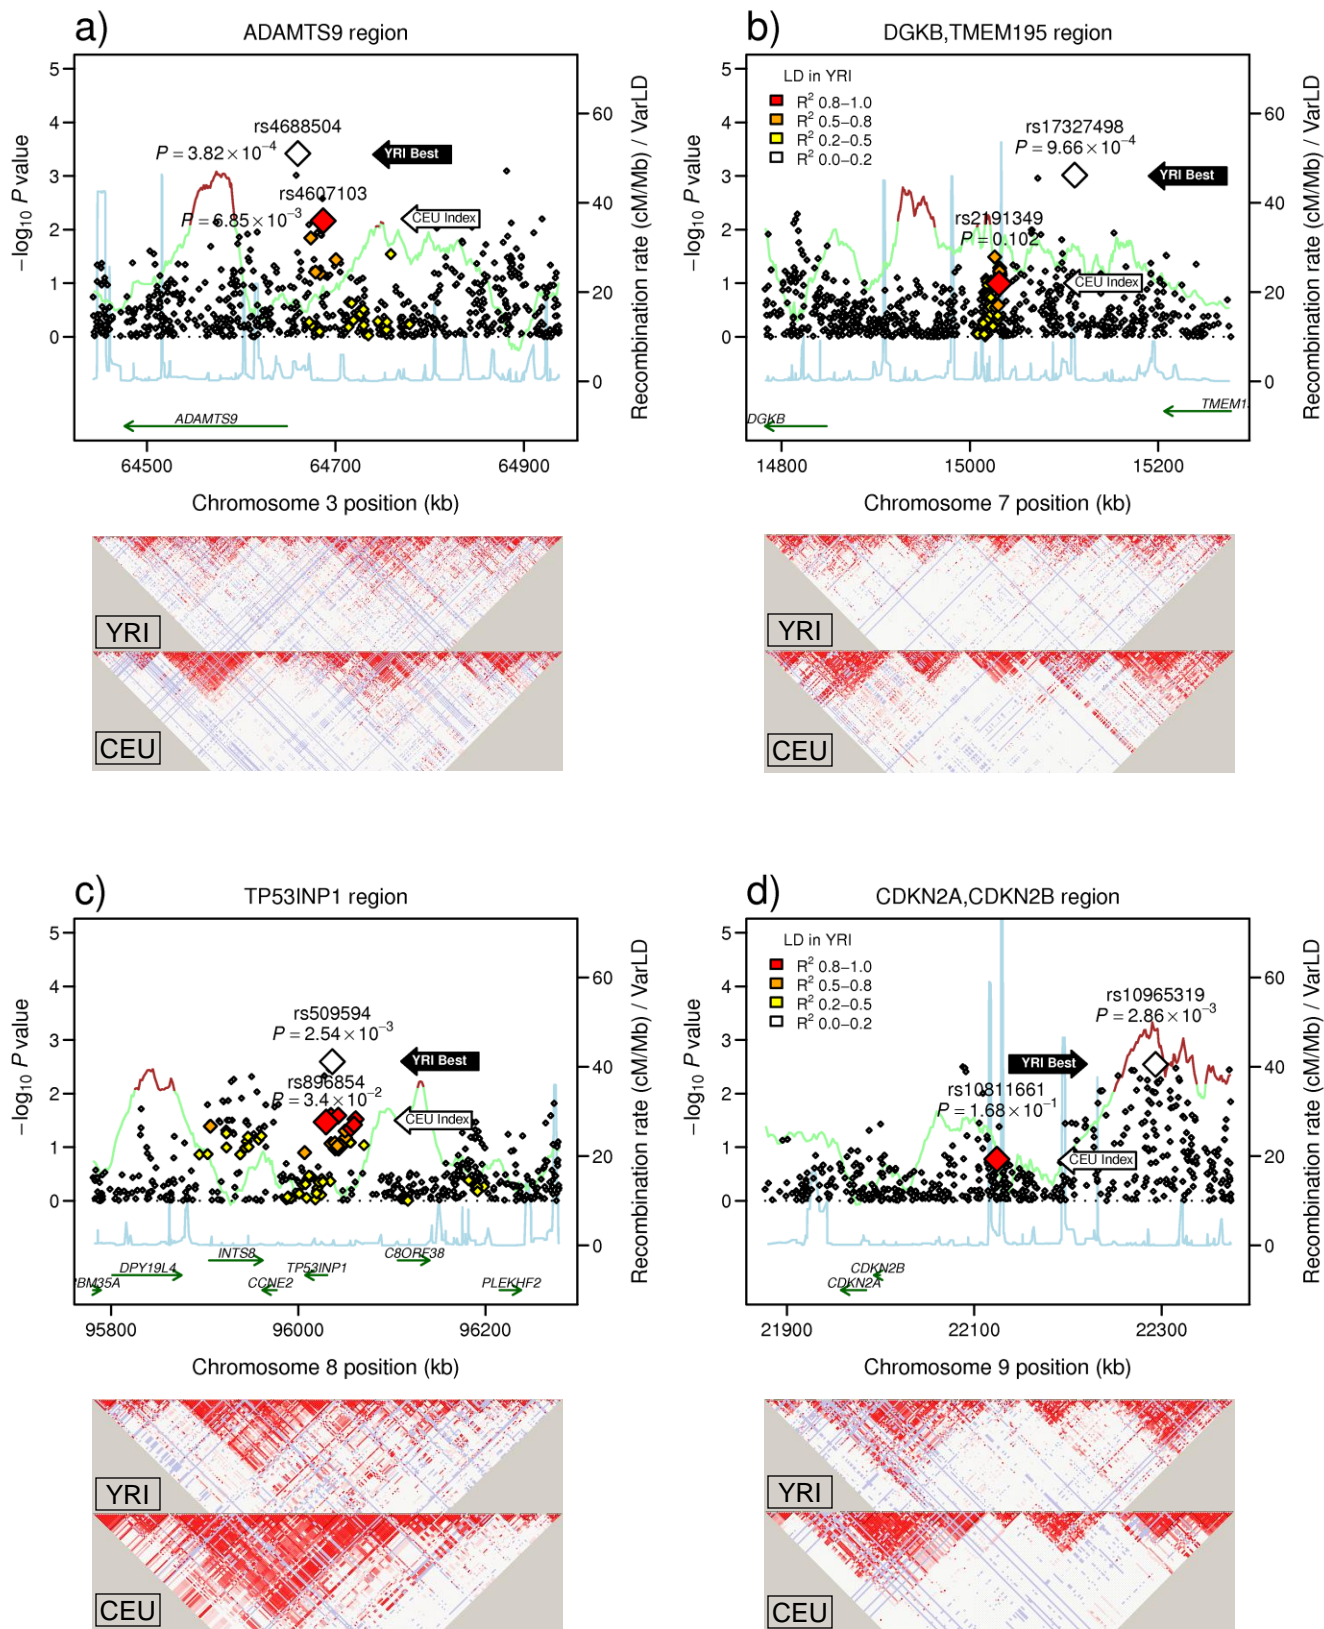

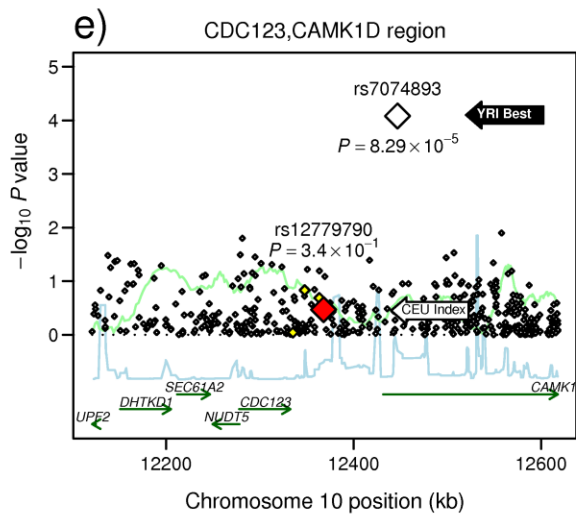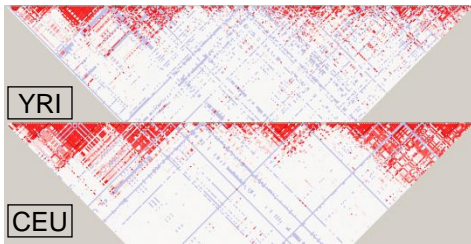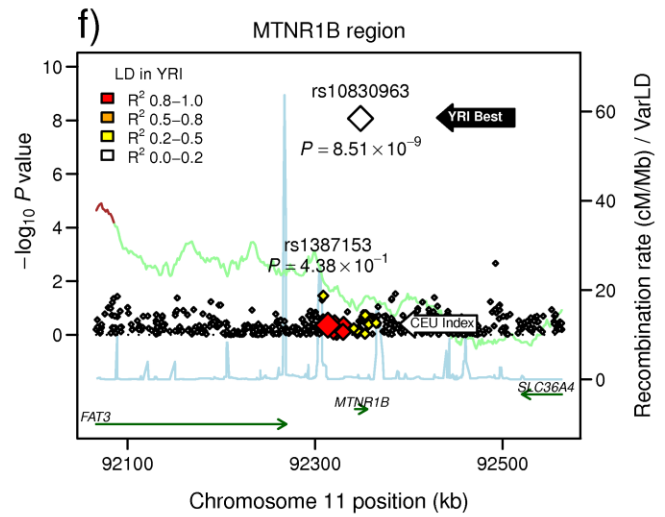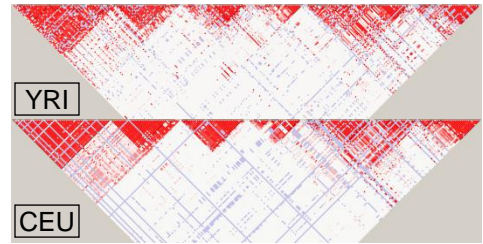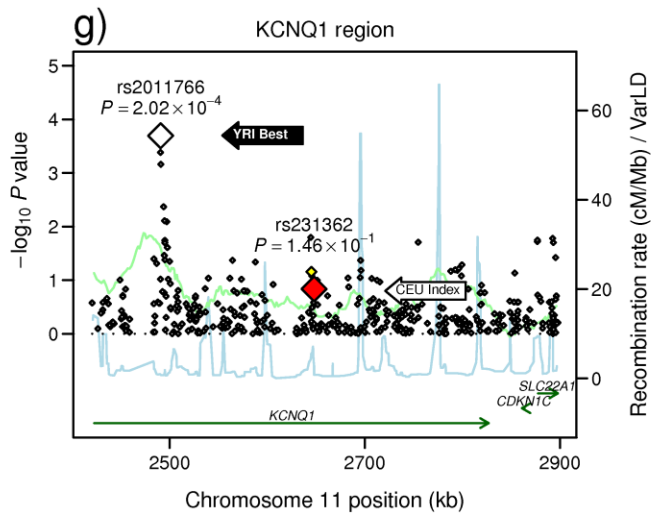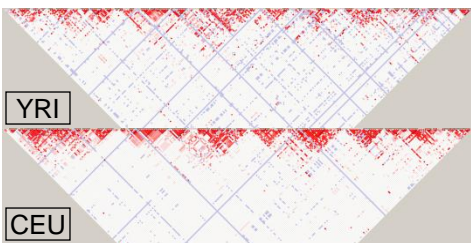

Supplement: NIHMS400966-supplement-2.pdf [file NIHMS400966-supplement-2.pdf]
